## Review Article

# Astrocyte adaptation in Alzheimer's disease: a focus on astrocytic P2X<sub>7</sub>R

Paula Beltran-Lobo<sup>1</sup>, Matthew J. Reid<sup>1</sup>, Maria Jimenez-Sanchez<sup>1</sup>, Alexei Verkhratsky<sup>2,3,4,5</sup>, Beatriz G. Perez-Nievas<sup>1</sup> and  Wendy Noble<sup>1</sup>

<sup>1</sup>Department of Basic and Clinical Neuroscience, King's College London, Institute of Psychiatry, Psychology and Neuroscience, 5 Cutcombe Road, London, SE5 9RX, U.K.; <sup>2</sup>Faculty of Biology, Medicine and Health, The University of Manchester, Manchester, U.K.; <sup>3</sup>Achucarro Center for Neuroscience, IKERBASQUE, 48011 Bilbao, Spain; <sup>4</sup>Department of Forensic Analytical Toxicology, School of Forensic Medicine, China Medical University, Shenyang, China; <sup>5</sup>Department of Stem Cell Biology, State Research Institute Centre for Innovative Medicine, LT-01102, Vilnius, Lithuania

**Correspondence:** Wendy Noble (wendy.noble@kcl.ac.uk) or Beatriz Gomez Perez-Nievas (Beatriz.gomez\_perez-nievas@kcl.ac.uk) or Alex Verkhratsky (alexj.verkhratsky@manchester.ac.uk) or Paula Beltran Lobo (paula.beltran\_lobo@kcl.ac.uk)

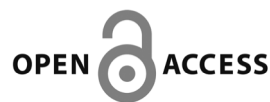

Astrocytes are key homeostatic and defensive cells of the central nervous system (CNS). They undertake numerous functions during development and in adulthood to support and protect the brain through finely regulated communication with other cellular elements of the nervous tissue. In Alzheimer's disease (AD), astrocytes undergo heterogeneous morphological, molecular and functional alterations represented by reactive remodelling, asthenia and loss of function. Reactive astrocytes closely associate with amyloid  $\beta$  ( $A\beta$ ) plaques and neurofibrillary tangles in advanced AD. The specific contribution of astrocytes to AD could potentially evolve along the disease process and includes alterations in their signalling, interactions with pathological protein aggregates, metabolic and synaptic impairments. In this review, we focus on the purinergic receptor, P2X<sub>7</sub>R, and discuss the evidence that P2X<sub>7</sub>R activation contributes to altered astrocyte functions in AD. Expression of P2X<sub>7</sub>R is increased in AD brain relative to non-demented controls, and animal studies have shown that P2X<sub>7</sub>R antagonism improves cognitive and synaptic impairments in models of amyloidosis and tauopathy. While P2X<sub>7</sub>R activation can induce inflammatory signalling pathways, particularly in microglia, we focus here specifically on the contributions of astrocytic P2X<sub>7</sub>R to synaptic changes and protein aggregate clearance in AD, highlighting cell-specific roles of this purinoceptor activation that could be targeted to slow disease progression.

## Introduction

Neuropathological changes in Alzheimer's disease (AD) include the progressive deposition of senile plaques and neurofibrillary tangles (NFTs), alongside extensive and complex glial alterations, vascular changes, synapse and neuron loss, leading to cognitive impairment and dementia [1].

Astrocytes are a subpopulation of glial cells derived from neuroepithelial progenitors that account for 20–40% of total glial cells in humans, depending on the brain region [2,3]. Single-cell transcriptomics revealed considerable molecular heterogeneity among astrocyte populations in rodent brain [4] as well as a complex stratified architecture across cerebral layers [5] that is likely more diverse in human brain, which in addition contain several forms of astrocytes absent in other mammals [6].

Astrocytes perform critical functions in the developing and adult CNS [7]. For example, during development, astrocytes remodel neuronal circuits, participating in the formation and pruning of synapses [8,9]. Astrocytes are functionally integrated with synapses, with all astrocytic compartments found to abut synapses in adult mouse hippocampus [10]. A particularly high density of pre-synaptic terminals and/or dendritic spines contact astrocytic branches and leaflets [10,11] which may result from these being amongst the most dynamic of astrocytic structures in response to neuronal signals [10]. Astrocytes,

Received: 25 August 2022  
Revised: 09 November 2022  
Accepted: 11 November 2022

Version of Record published:  
03 March 2023

together with other cellular and non-cellular elements, form multipartite synapses that regulate various aspects of synaptic function [12]. Astrocytes control synaptogenesis, synaptic maturation, synaptic maintenance and synaptic extinction through the release of multiple specific regulatory molecules including thrombospondins, hevins, glypicans, norrin and many more [13]. Astrocytes modulate synaptic activity by several mechanisms of which  $K^+$  buffering, glutamate clearance by astrocyte specific excitatory amino acid transporter (EAAT)1/2 receptors and supplying glutamine by the glutamate-(GABA)-glutamine shuttle are of particular relevance [14]. Astrocytes release small molecules such as adenosine-triphosphate (ATP) which is rapidly converted to adenosine by ectonucleotidases to suppress excitatory transmission by acting on presynaptic adenosine  $A_1$  receptors ( $A_1R$ ) [15,16]. Astrocytes also participate in the maintenance of ion homeostasis allowing the rapid uptake of  $K^+$  from the extracellular space during neuronal activity [17]. Thus, astrocytes are actively engaged in the regulation of synaptic transmission, synaptic plasticity and maintenance of neuronal circuitry in the CNS, as previously reviewed [11].

In addition, astrocytic end-feet are a parenchymal component of the blood–brain barrier (BBB). They contribute to the regulation of blood flow in response to neuronal activity, along with perivascular neuronal terminals, endothelial cells and pericytes, in a process known as neurovascular coupling [18]. Astrocytes take up glucose, the main energy source of the brain, and store it as glycogen, or may supply it to neurons in the form of lactate [19,20], although this is debated. Furthermore, end-feet-specific expression of aquaporin-4 (AQP4) maintains the proper function of glymphatic system which facilitates the elimination of toxic solutes from the interstitial fluid [21].

## Astrocytes in AD

Brain injury associated with trauma, stroke, neuroinfection or immune attack triggers specific and stereotypical defensive responses of astrocytes known as reactive astrogliosis in which astrocytes proliferate, form a glial scar and promote the recruitment of immune cells. In neurodegenerative diseases including AD, astrocytes undergo morphological, molecular and functional changes commonly known as astrocytic reactivity [22]. In contrast to the *bona fide* stereotypical reactive astrogliosis that is triggered by brain lesions associated with a breach of the BBB, astrocytic reactivity in chronic neurological diseases is highly dynamic and heterogeneous [22].

Glial fibrillary acidic protein (GFAP) is a cytoskeletal protein in astrocytes that is increased to allow cytoskeletal rearrangement in response to many physiological and disease stimuli [22–25]. In human AD brain, astrocytes expressing different isoforms and/or truncated forms of GFAP cluster around  $A\beta$  plaques [26,27]. This is similar in mice where, without altering their spatial distribution, astrocytes extend their processes towards amyloid deposits [28]. Astrocytes with GFAP-immunoreactivity are also associated with ghost neurofibrillary tangles (NFTs) in advanced stages of AD [29], a feature believed to result from astrocyte processes having penetrated extracellular ghost tangles or tangle-bearing neurons in advanced AD and becoming separated from the soma [30–32]. Moreover, increased numbers of GFAP-immunoreactive astrocytes in the superior temporal sulcus are among the molecular features that distinguish between AD cases with dementia and those showing resilience to cognitive decline [33].

Levels of GFAP in brain tissue are high in prodromal AD [34] and an increase in the levels of GFAP in cerebrospinal fluid (CSF) and plasma of AD patients is also detected in early stages, that peaks upon symptom onset [35]. Recent work using specific positron electron tomography (PET) ligands demonstrated an association between  $A\beta$ , but not tau, burden and CSF GFAP levels [36]. These authors further showed that the strength of tau-PET signals is more closely associated with increases in CSF levels of a putative marker of astrocyte reactivity YKL-40 [37] that is expressed only in a subset of astrocytes [38] and also by several other cell types [39]. Others have reported that CSF YKL-40 levels are distinct from grey matter loss associated with phosphorylated tau [40].

However, characterisation of GFAP immunostaining is insufficient to make conclusions about functional changes in astrocytes. Indeed, astrocytes show considerable transcriptomic heterogeneity in the diseased brain [41], even amongst cases with the same diagnosis [42]. Recent multi-transcriptomic analysis of human astrocytes in AD relative to control brain revealed increases in genes related to specialized astrocyte-neuron contacts at perisynaptic astrocyte leaflets that influence the function of adjacent synapses, alongside downregulation of endolysosomal and mitochondrial genes in astrocytes, that for mitochondrial genes were found to decline as disease severity increased [42]. The decrease in endolysosomal and mitochondria-related genes, but not the upregulation of synapse-related genes, was mirrored in transgenic APP/PS1 mice [42].

Astrocytes, like microglia, possess a myriad of cell surface receptors through which they recognise a variety of stimuli [43]. These include molecules released upon cell damage including adenosine triphosphate (ATP) which is rapidly converted to adenosine by ectonucleotidases, heat-shock proteins, and disease-specific pathological species of  $A\beta$  and tau [44–47]. The binding of these pathogenic molecules to astrocytic receptors is a key step for the initiation of signal transduction cascades that increase the transcription of target genes [48,49]. Below, we discuss how

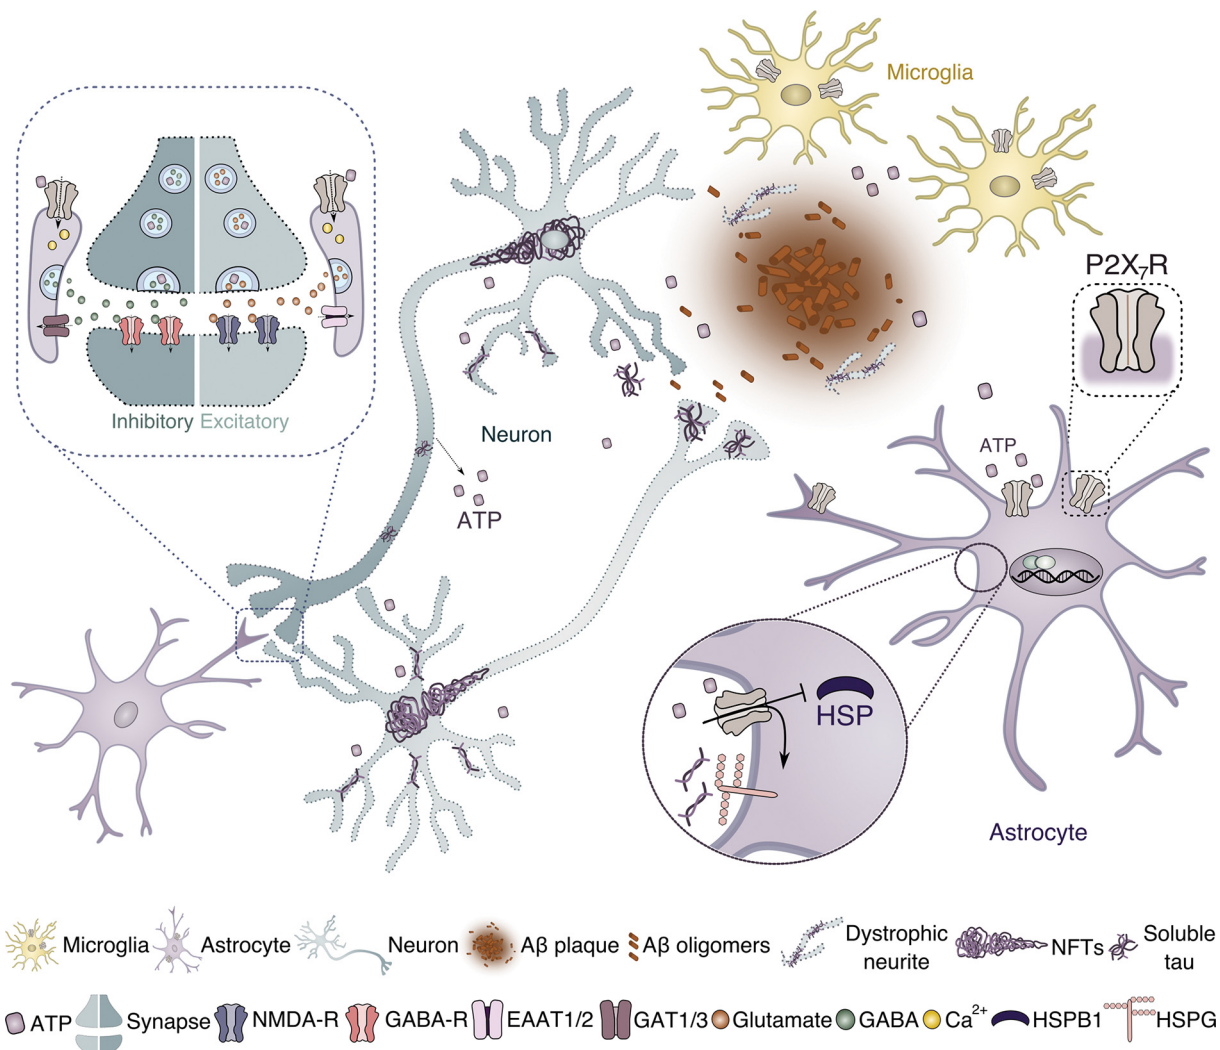

**Figure 1. Potential roles of astrocytic P2X<sub>7</sub>R in synaptic function and protein clearance in AD**

In AD brain, high levels of ATP could activate P2X<sub>7</sub>R in astrocytes and contribute to defects in neurotransmission. The opening of P2X<sub>7</sub>R channels allows calcium influx which modulates the release of glutamate to the synaptic cleft, where it could bind to NMDA-Rs at the post-synapse. P2X<sub>7</sub>R could also participate in the regulation of inhibitory synapses, by modulating the release of GABA from astrocytes. In addition to their intimate association with synapses, astrocytes also play important roles in the maintenance of protein homeostasis through the internalisation and degradation of Aβ and tau aggregates. In AD, astrocytic P2X<sub>7</sub>R could alter protein clearance pathways via HSPB1-mediated autophagy or the regulation of HSPG expression, which might influence astrocyte uptake and clearance of tau species.

sensing through one of these receptors, the purinergic P2X<sub>7</sub> receptor, may contribute to alterations in synaptic and endolysosome-related functions of astrocytes in AD (Figure 1).

## Purinergic receptors

The purinoreceptor family includes highly conserved receptors that bind adenine (P<sub>0</sub> receptors), adenosine (P<sub>1</sub> receptors) and ADP/ATP (P<sub>2</sub> receptors) [50–53]. P<sub>2</sub> receptors are further classified into G-protein coupled (P<sub>2</sub>Y) and ion-gated (P<sub>2</sub>X) receptors [54]. To date, seven P<sub>2</sub>X (P<sub>2</sub>X<sub>1-7</sub>R) and eight P<sub>2</sub>Y (P<sub>2</sub>Y<sub>1</sub>R, P<sub>2</sub>Y<sub>2</sub>R, P<sub>2</sub>Y<sub>4</sub>R, P<sub>2</sub>Y<sub>6</sub>R, P<sub>2</sub>Y<sub>11-14</sub>R) subtypes have been identified, including P<sub>2</sub>Y receptors with the ability to sense pyrimidines (e.g., uridine diphosphate [UDP], UDP-glucose, UDP-galactose) in addition to purines [55].

## P2X<sub>7</sub>R

The P2X<sub>7</sub>R protein consists of a short intracellular N-terminal domain, two transmembrane  $\alpha$ -helices, an extracellular loop enriched in N-glycosylation sites and a long cytoplasmic C-terminal domain [56,57]. P2X<sub>7</sub>R is typically found in a resting/closed or apo-state conformation, with a narrow cavity through which ATP must access to reach the active binding pocket. When ATP binds to P2X<sub>7</sub>R, conformational rearrangements lead to the opening of an ion-permeable channel that allows the influx (i.e., Na<sup>+</sup>, Ca<sup>2+</sup>) and efflux (i.e., K<sup>+</sup>) of small cations, and upon channel dilatation into a larger pore, the entry of large hydrophilic molecules at a slower rate [58]. In contrast to other P2X subtypes, P2X<sub>7</sub>R does not undergo desensitisation after activation of the receptor due to permanent stabilization provided by a palmitoylated cysteine rich region in the cytoplasmic domain [59]. This feature of P2X<sub>7</sub>R activation dynamics likely contributes to the hyperpolarised astrocyte membrane potential that is important for astrocyte physiology and functions [60].

The human P2X<sub>7</sub>R gene is highly polymorphic with more than 150 non-synonymous SNPs, the majority of which lead to amino acid substitutions in the extracellular loop or the cytoplasmic C-terminal tail [61], affecting agonist binding affinity [62], trafficking to membranes [63], ion channel activity [64] and permeability of the pore [65]. In humans, there are seven splice variants of P2X<sub>7</sub>R, two of which are predominantly expressed in the CNS and immune tissues including the full-length (P2X<sub>7</sub>R A) and a C-terminally truncated form with an early stop codon (P2X<sub>7</sub>R B) [66,67]. The latter gives rise to a receptor deficient in the formation of a large permeable pore that retains ion channel properties [67].

Opening of the P2X<sub>7</sub>R channel is stimulated by ATP concentrations in the higher micromolar to millimolar range, in contrast to the lower ATP concentrations required for opening of other P2X family members, with ATP<sup>4-</sup> being a true agonist [68]. ATP can be sensed by P2X<sub>7</sub>Rs in rodent or human microglia which show the highest levels of P2X<sub>7</sub>R expression in the brain [69–72] and oligodendrocytes [73,74]. Whilst the neuronal localization of P2X<sub>7</sub>R remains controversial [75,76], P2X<sub>7</sub>R expression in astrocytes [71,72,77–80] has been confirmed by the presence of agonist-induced currents and Ca<sup>2+</sup> responses [78,81–86]. Activation of P2X<sub>7</sub>R in astrocytes triggers various cellular signals including those that stimulate nitrous oxide and superoxide radicals production [87,88], Akt and mitogen-activated protein kinase (MAPK) signalling [89–91], secretion of cytokines and other mediators of inflammation [88,89,92–94], as well as the release of gliotransmitters [81,95,96].

## P2X<sub>7</sub>R in AD

While there is limited evidence that single nucleotide polymorphisms that alter P2X<sub>7</sub>R activity influence the risk of AD [97], converging studies show enhanced levels of P2X<sub>7</sub>R mRNA and P2X<sub>7</sub>R protein in AD post-mortem brains in comparison with non-demented controls suggesting an involvement of this purinoreceptor in AD [71,98,99]. This increase is similarly observed in several transgenic mouse models of familial AD that overexpress mutant forms of APP including Tg2576 [80], APP/PS1 [100] and J20 [99] mice as well as in tauopathy models carrying mutations in MAPT [63]. Higher levels of P2X<sub>7</sub>R were observed at 12 months relative to 3-month-old APP/PS1 mice suggesting that P2X<sub>7</sub>R expression increases with disease progression [100]. P2X<sub>7</sub>R protein increases are particularly apparent surrounding A $\beta$  plaques in AD brain [71,99,101], and this plaque-associated up-regulation is recapitulated in transgenic rodent models of amyloidogenesis [80,99,100]. In addition to changes in P2X<sub>7</sub>R expression, pharmacological antagonism or genetic deletion of P2X<sub>7</sub>R protects against disease in mouse models harbouring A $\beta$  [62,92] or tau pathology [63,91,93] indicating that P2X<sub>7</sub>R-mediated functions contribute to the disease process.

## P2X<sub>7</sub>R contributions to astrocyte driven synaptic changes in AD

Astrocytes are implicated in the deterioration of synaptic transmission in AD, affecting both excitatory (glutamatergic) and inhibitory  $\gamma$ -aminobutyric acid (GABA)-ergic synapses [14]. A $\beta$  induces calcium dysregulation in astrocytes which can affect their ability to modulate neurotransmission [102,103]. For example, astrocytes can induce neuronal hyperactivity through the transient receptor potential cation channel, subfamily A, member 1 (TRPA1) in response to A $\beta$ , which potentiates the release of excitatory glutamate in APP/PS1 mice [104]. Reports describing an increase in the release of the N-methyl-D-aspartate receptor (NMDA-R) co-factor D-serine from these astrocytes are now questioned, since astrocytes do not produce D-serine but rather L-serine which can be shuttled to neurons to drive neuronal production of D-serine [105]. Compromised glucose metabolism is observed in prodromal stages of AD which correlates with disease progression [14,106]. Accordingly, reduced aerobic glycolysis is also observed in prodromal AD [107], one consequence of which is decreased L-serine synthesis by astrocytes [108]. This disrupts NMDA-R-mediated synaptic plasticity and cognitive function in AD mice, which can be recovered upon dietary L-serine supplementation [109].

In transgenic mice expressing AD-causing mutant forms of *APP* and *PSEN1* (*APP/PS1*), astrocytes surrounding A $\beta$  plaques have lower levels of EAAT2, which leads to an extra-synaptic accumulation of glutamate, neuronal hyperactivity [110] potentially mediated by neuronal NMDA receptors [111], and possibly neurotoxicity. However, whether or not this is true in human disease is uncertain since analysis of postmortem brain from AD cases with significant amyloid and tau pathology showed higher levels of astrocytic EAAT2 in comparison with non-demented cases carrying AD pathology, pointing towards a mechanism of astrocytic resilience against neuropathological changes in AD [112]. Astrocytic P2X<sub>7</sub>R could be activated by ATP, or potentially indirectly, by A $\beta$  [113], in the vicinity of senile plaques to contribute to excess glutamate levels. Stimulation of P2X<sub>7</sub>R in hippocampal, spinal cord and substantia gelatinosa astrocytes using the potent broad agonist 2'(3')-O-(4-benzoylbenzoyl)adenosine 5'-triphosphate (BzATP) induces glutamate release and stimulation of neighbouring NMDA-Rs through a Ca<sup>2+</sup>-dependent mechanism [114,115]. The opening of P2X<sub>7</sub>R pores could also mobilise other transmitter-containing vesicles following Ca<sup>2+</sup> entry, but the precise molecular pathways that mediate these events remain obscure [75]. Astrocytes can also influence neuronal inhibition by increasing GABA release at the synaptic cleft in mice expressing five familial mutations in *APP* and *PSEN1* (5x*FAD* mice, [116]), and some GABA release from astrocytes is regulated by P2X<sub>7</sub>Rs, at least in stratum radiatum astrocytes proximal to interneurons in the hippocampus [117].

## P2X<sub>7</sub>R and astrocytic protein clearance pathways – implications for AD

Recent analysis showed that endolysosomal pathway components, fundamental for the uptake, processing, degradation and disposal of proteins and cellular debris, are down-regulated in AD astrocytes [42]. Indeed astrocytes, in addition to microglia, play central roles in the clearance of protein aggregates and other debris in degenerating AD brain [118]. By surrounding A $\beta$  plaques, glia erect a physical and functional barrier to isolate and potentially clear proteinaceous aggregates from the affected neuropil [119].

A $\beta$  oligomers are observed within astrocytes in post-mortem AD brain [120] and mature healthy astrocytes engulf and degrade A $\beta$  species *in vitro* and *ex vivo* [121,122]. Inhibition of reactive astrogliosis either increases [123] or reduces [124] levels of A $\beta$  in *APP/PS1* mice. The astrocyte-mediated internalisation of A $\beta$  occurs in a ApoE-dependent manner, since *ApoE* deficient astrocytes are not capable of removing amyloid [125], with efficient A $\beta$  uptake and clearance from astrocytes dependent on transcription factor EB (TFEB)-mediated lysosomal degradation [126]. Similarly, there is evidence that the A $\beta$  sensor low density lipoprotein receptor-related protein 1 (LRP1) is critical for astrocytic uptake and degradation of A $\beta$  [47]. Astrocytes can also upregulate the expression of extracellular proteolytic enzymes that target A $\beta$  including insulin degrading enzyme [127], released via an unconventional autophagy-dependent secretory pathway, and endothelin-converting enzyme-2 [128], they are efficient in autophagy and can potentially limit the accumulation of A $\beta$  species in AD [118].

Astrocytes can also internalize modified forms of tau protein. In a tauopathy mouse model in which tau was expressed specifically in entorhinal cortex neurons, tau aggregates that spread trans-synaptically to the dentate gyrus were detected in astrocytes [129]. These data indicate that astrocytes internalize and may contribute to tau propagation. Indeed, extracellular forms of fibrillar tau are taken up by astrocytes [46], including at synapses for redirection into lysosomal degradation pathways to regulate tau spread [130]. Data also implicates heparin sulphate proteoglycans (HSPGs) and LRP1 in tau uptake by astrocytes, with the efficiency of the uptake varying depending on disease-associated tau modifications [131–134].

While the direct contributions of astrocytic P2X<sub>7</sub>R to these processes have not been investigated in detail, several independent studies demonstrated that pharmacological blockade or genetic deletion of P2X<sub>7</sub>R is beneficial in mouse models of AD, reporting reduced amyloid plaque number and abundance of soluble A $\beta$  species in mouse models of amyloidosis [71,135]. In tauopathy mouse models, decreases in tau phosphorylation at certain epitopes [72,101] or a reduction in the abundance of misfolded tau forms [136] were reported. Although some alterations in microglial morphology and functions including phagocytosis, migration and cytokine release were observed upon P2X<sub>7</sub>R inhibition [72,101], no consistent changes were detected between the different mouse models [71,136]. No alterations in protein degradation pathways were described although P2X<sub>7</sub>R induction in microglia is known to impair lysosomal function, increasing levels of the autophagosome membrane-associated form of microtubule-associated protein 1 light chain 3 (LC3)-II in a Ca<sup>2+</sup>-dependent manner, up-regulating the formation of autophagosomes and autophagolysosomes, and increasing the release of autophagosomes [137,138]. We suggest that further exploration of the potential contribution of astrocytic P2X<sub>7</sub>R to these processes is warranted since P2X<sub>7</sub>R activation also regulates autophagy in astrocytes [139,140]. Astrocytes are damaged in status epilepticus, and they form vacuoles containing lysosome-associated membrane protein (LAMP)-1 [141]. P2X<sub>7</sub>R antagonism was found to decrease astrocyte damage in the molecular layer of the dentate gyrus and frontoparietal cortex under these conditions [142] which could

be caused by a prolonged induction of the molecular chaperone small heat-shock protein (HSP)B1, a HSP that facilitates the folding and removal of aberrant proteins, and, in turn, promotes astroglial autophagy [139]. Others have shown similar effects in P2X<sub>7</sub>R knockout mice, where P2X<sub>7</sub>R signalling to focal adhesion kinase (FAK) was found to regulate HSPB25 and fine tune autophagy [140]. Since, as we discuss above, astrocytes efficiently internalise A $\beta$  and modified forms of tau in disease, these data may suggest that P2X<sub>7</sub>R-induced regulation of autophagy in astrocytes is important for limiting proteinaceous spread in AD and tauopathies. Finally, tau internalization and release may be mediated by HSPGs [143,144]. P2X<sub>7</sub>R also regulates HSPG expression and localization, at least in the cornea [145], and we suggest that exploration of the potential for P2X<sub>7</sub>R signalling to similarly affect HSPGs in astrocytes and alter tau clearance is warranted.

In summary, we provide an overview of synapse-related and protein clearance functions of astrocytes that can be modulated by P2X<sub>7</sub>R signalling in AD. P2X<sub>7</sub>R has gained much attention in recent years as a possible therapeutic target. Genetic deletion of P2X<sub>7</sub>R in APP/PS1 mice improved long-term synaptic plasticity, spatial learning and memory dysfunction relative to wild-type littermates [71], and P2X<sub>7</sub>R antagonism in mouse models of tauopathy harbouring the frontotemporal dementia (FTD)-causing *MAPT* mutations G272V and/or P301S ameliorates cognitive and behavioural deficits as well as synaptic dysfunction [72,101,136]. We suggest that further exploration of P2X<sub>7</sub>R-driven effects on biological processes linked with astrocyte contributions to AD may uncover novel targets for therapeutic intervention.

## Summary

- Astrocytes play critical roles in maintaining a healthy brain environment. This is mediated through multiple homeostatic transporters, interactions with neurons and microglia, and functions at the blood brain barrier and synapses.
- Some astrocytes become ‘reactive’ in AD, while others show asthenia and loss of homeostatic functions. Astrocytes in AD reduce their support for synapses and show deficits in endolysosomal pathway components.
- There are increases in P2X<sub>7</sub>R mRNA and protein in AD, particularly in the vicinity of plaques. P2X<sub>7</sub>R activation in astrocytes influences synaptic activity and protein clearance pathways, and this may be one route by which P2X<sub>7</sub>R affects AD progression.
- Further exploration of the functional consequences of astrocytic P2X<sub>7</sub>R in AD may reveal novel cell-type specific targets for intervention.

## Competing Interests

The authors declare that there are no competing interests associated with the manuscript.

## Funding

Our work is funded by Alzheimer’s Research UK [grant numbers ARUK-PhD2018-002 and ARUK-PG2019A-004 (to W.N. and B.G.P.-N.)] and a Medical Research Council Transition Award [MR/V036947/1 (to M.J.-S.)].

## Author Contribution

All authors wrote and edited the manuscript. For the purpose of open access, the author has applied a Creative Commons Attribution (CC BY) licence to any Author Accepted Manuscript version arising.

## Abbreviations

A1R, adenosine A1 receptor; AD, Alzheimer’s disease; ADP, adenosine diphosphate; AMP, adenosine monophosphate; ApoE, apolipoprotein E; APP, amyloid precursor protein; AQP4, aquaporin-4; ATP, adenosine triphosphate; A $\beta$ ,  $\beta$ -amyloid; CNS, central nervous system; CSF, cerebrospinal fluid; EAAT (1/2), excitatory amino acid transporter (1/2); FAK, focal adhesion kinase; GABA,  $\gamma$  amino-butyric acid; GABA-R, GABA receptor; GAT1/3, GABA transporter type 1/3; GFAP, glial fibrillary acidic protein; HSPB1, heat shock protein B1; HSPB25, heat shock protein B25; HSPG, heparin sulphate proteoglycan; LAMP1, lysosome associated membrane protein 1; LRP1, low density lipoprotein receptor-related protein 1; NFTs, neurofibrillary tangles; NMDAR,

N-methyl-D-aspartate receptor; PET, positron electron tomography; PS1, presenilin 1; TFEB, transcription factor EB; TRPA1, transient receptor potential cation channel, subfamily A, member 1; UDP, uridine diphosphate.

## References

- 1 Henstridge, C.M., Hyman, B.T. and Spire-Jones, T.L. (2019) Beyond the neuron-cellular interactions early in Alzheimer disease pathogenesis. *Nat. Rev. Neurosci.* **20**, 94–108, <https://doi.org/10.1038/s41583-018-0113-1>
- 2 Molofsky, A.V. and Deneen, B. (2015) Astrocyte development: a guide for the perplexed. *Glia* **63**, 1320–1329, <https://doi.org/10.1002/glia.22836>
- 3 von Bartheld, C.S., Bahney, J. and Herculano-Houzel, S. (2016) The search for true numbers of neurons and glial cells in the human brain: A review of 150 years of cell counting. *J. Comp. Neurol.* **524**, 3865–3895, <https://doi.org/10.1002/cne.24040>
- 4 Batiuk, M.Y., Martirosyan, A., Wahis, J., de Vin, F., Marneffe, C., Kusserow, C. et al. (2020) Identification of region-specific astrocyte subtypes at single cell resolution. *Nat. Commun.* **11**, 1220, <https://doi.org/10.1038/s41467-019-14198-8>
- 5 Bayraktar, O.A., Bartels, T., Holmqvist, S., Kleshchevnikov, V., Martirosyan, A., Polioudakis, D. et al. (2020) Astrocyte layers in the mammalian cerebral cortex revealed by a single-cell in situ transcriptomic map. *Nat. Neurosci.* **23**, 500–509, <https://doi.org/10.1038/s41593-020-0602-1>
- 6 Oberheim, N.A., Takano, T., Han, X., He, W., Lin, J.H., Wang, F. et al. (2009) Uniquely hominid features of adult human astrocytes. *J. Neurosci.* **29**, 3276–3287, <https://doi.org/10.1523/JNEUROSCI.4707-08.2009>
- 7 Perez-Nievas, B.G. and Serrano-Pozo, A. (2018) Deciphering the astrocyte reaction in Alzheimer's disease. *Front. Aging Neurosci.* **10**, 114, <https://doi.org/10.3389/fnagi.2018.00114>
- 8 Allen, N.J., Bennett, M.L., Foo, L.C., Wang, G.X., Chakraborty, C., Smith, S.J. et al. (2012) Astrocyte glypican 4 and 6 promote formation of excitatory synapses via GluA1 AMPA receptors. *Nature* **486**, 410–414, <https://doi.org/10.1038/nature11059>
- 9 Chung, W.S., Clarke, L.E., Wang, G.X., Stafford, B.K., Sher, A., Chakraborty, C. et al. (2013) Astrocytes mediate synapse elimination through MEGF10 and MERTK pathways. *Nature* **504**, 394–400, <https://doi.org/10.1038/nature12776>
- 10 Aten, S., Kiyoshi, C.M., Arzola, E.P., Patterson, J.A., Taylor, A.T., Du, Y. et al. (2022) Ultrastructural view of astrocyte arborization, astrocyte-astrocyte and astrocyte-synapse contacts, intracellular vesicle-like structures, and mitochondrial network. *Prog. Neurobiol.* **213**, 102264, <https://doi.org/10.1016/j.pneurobio.2022.102264>
- 11 Semyanov, A. and Verkhratsky, A. (2021) Astrocytic processes: from tripartite synapses to the active milieu. *Trends Neurosci.* **44**, 781–792, <https://doi.org/10.1016/j.tins.2021.07.006>
- 12 Verkhratsky, A. and Nedergaard, M. (2014) Astroglial cradle in the life of the synapse. *Philos. Trans. R. Soc. Lond. B Biol. Sci.* **369**, 20130595, <https://doi.org/10.1098/rstb.2013.0595>
- 13 Augusto-Oliveira, M., Arrifano, G.P., Takeda, P.Y., Lopes-Araujo, A., Santos-Sacramento, L., Anthony, D.C. et al. (2020) Astroglia-specific contributions to the regulation of synapses, cognition and behaviour. *Neurosci. Biobehav. Rev.* **118**, 331–357, <https://doi.org/10.1016/j.neubiorev.2020.07.039>
- 14 Andersen, J.V., Schousboe, A. and Verkhratsky, A. (2022) Astrocyte energy and neurotransmitter metabolism in Alzheimer's disease: integration of the glutamate/GABA-glutamine cycle. *Prog. Neurobiol.* 102331, <https://doi.org/10.1016/j.pneurobio.2022.102331>
- 15 Henneberger, C., Papouin, T., Oliet, S.H. and Rusakov, D.A. (2010) Long-term potentiation depends on release of D-serine from astrocytes. *Nature* **463**, 232–236, <https://doi.org/10.1038/nature08673>
- 16 Pascual, O., Casper, K.B., Kubera, C., Zhang, J., Revilla-Sanchez, R., Sul, J.Y. et al. (2005) Astrocytic purinergic signaling coordinates synaptic networks. *Science* **310**, 113–116, <https://doi.org/10.1126/science.1116916>
- 17 Seifert, G., Henneberger, C. and Steinhauser, C. (2018) Diversity of astrocyte potassium channels: An update. *Brain Res. Bull.* **136**, 26–36, <https://doi.org/10.1016/j.brainresbull.2016.12.002>
- 18 Mishra, A. (2017) Binaural blood flow control by astrocytes: listening to synapses and the vasculature. *J. Physiol.* **595**, 1885–1902, <https://doi.org/10.1113/JP270979>
- 19 Machler, P., Wyss, M.T., Elsayed, M., Stobart, J., Gutierrez, R., von Faber-Castell, A. et al. (2016) In vivo evidence for a lactate gradient from astrocytes to neurons. *Cell Metab.* **23**, 94–102, <https://doi.org/10.1016/j.cmet.2015.10.010>
- 20 Morgello, S., Uson, R.R., Schwartz, E.J. and Haber, R.S. (1995) The human blood-brain barrier glucose transporter (GLUT1) is a glucose transporter of gray matter astrocytes. *Glia* **14**, 43–54, <https://doi.org/10.1002/glia.440140107>
- 21 Iliif, J. and Simon, M. (2019) CrossTalk proposal: The glymphatic system supports convective exchange of cerebrospinal fluid and brain interstitial fluid that is mediated by perivascular aquaporin-4. *J. Physiol.* **597**, 4417–4419, <https://doi.org/10.1113/JP277635>
- 22 Escartin, C., Galea, E., Lakatos, A., O'Callaghan, J.P., Petzold, G.C., Serrano-Pozo, A. et al. (2021) Reactive astrocyte nomenclature, definitions, and future directions. *Nat. Neurosci.* **24**, 312–325, <https://doi.org/10.1038/s41593-020-00783-4>
- 23 Santos, G.W.Q., Araujo, J.F., Cunha, M.J.B., Costa, S.O., Barbosa, A.L.C., Mesquita, J.B. et al. (2005) Circadian variation in GFAP immunoreactivity in the mouse suprachiasmatic nucleus. *Biol. Rhythm. Res.* **36**, 141–150, <https://doi.org/10.1080/09291010400028906>
- 24 Rodriguez, J.J., Terzieva, S., Olabarria, M., Lanza, R.G. and Verkhratsky, A. (2013) Enriched environment and physical activity reverse astroglial degeneration in the hippocampus of AD transgenic mice. *Cell Death Dis.* **4**, e678, <https://doi.org/10.1038/cddis.2013.194>
- 25 Carvalho-Paulo, D., de Morais Magalhaes, N.G., de Almeida Miranda, D., Diniz, D.G., Henrique, E.P., Moraes, I.A.M. et al. (2017) Hippocampal astrocytes in migrating and wintering semipalmated sandpiper calidris pusilla. *Front. Neuroanat.* **11**, 126, <https://doi.org/10.3389/fnana.2017.00126>
- 26 Mouser, P.E., Head, E., Ha, K.H. and Rohn, T.T. (2006) Caspase-mediated cleavage of glial fibrillary acidic protein within degenerating astrocytes of the Alzheimer's disease brain. *Am. J. Pathol.* **168**, 936–946, <https://doi.org/10.2353/ajpath.2006.050798>
- 27 Kamphuis, W., Middeldorp, J., Kooijman, L., Sluijs, J.A., Kooi, E.J., Moeton, M. et al. (2014) Glial fibrillary acidic protein isoform expression in plaque related astrogliosis in Alzheimer's disease. *Neurobiol. Aging* **35**, 492–510, <https://doi.org/10.1016/j.neurobiolaging.2013.09.035>

- 28 Galea, E., Morrison, W., Hudry, E., Arbel-Ornath, M., Bacsikai, B.J., Gomez-Isla, T. et al. (2015) Topological analyses in APP/PS1 mice reveal that astrocytes do not migrate to amyloid-beta plaques. *Proc. Natl. Acad. Sci. U.S.A.* **112**, 15556–15561, <https://doi.org/10.1073/pnas.1516779112>
- 29 Irwin, D.J., Cohen, T.J., Grossman, M., Arnold, S.E., Xie, S.X., Lee, V.M. et al. (2012) Acetylated tau, a novel pathological signature in Alzheimer's disease and other tauopathies. *Brain* **135**, 807–818, <https://doi.org/10.1093/brain/aws013>
- 30 Ikeda, K., Haga, C., Akiyama, H., Kase, K. and Iritani, S. (1992) Coexistence of paired helical filaments and glial filaments in astrocytic processes within ghost tangles. *Neurosci. Lett.* **148**, 126–128, [https://doi.org/10.1016/0304-3940\(92\)90820-W](https://doi.org/10.1016/0304-3940(92)90820-W)
- 31 Ikeda, K., Haga, C., Oyanagi, S., Iritani, S. and Kosaka, K. (1992) Ultrastructural and immunohistochemical study of degenerate neurite-bearing ghost tangles. *J. Neurol.* **239**, 191–194, <https://doi.org/10.1007/BF00839138>
- 32 Probst, A., Ulrich, J. and Heitz, P.U. (1982) Senile dementia of Alzheimer type: astroglial reaction to extracellular neurofibrillary tangles in the hippocampus. An immunocytochemical and electron-microscopic study. *Acta Neuropathol.* **57**, 75–79, <https://doi.org/10.1007/BF00688880>
- 33 Perez-Nievas, B.G., Stein, T.D., Tai, H.C., Dols-Icardo, O., Scotton, T.C., Barroeta-Espar, I. et al. (2013) Dissecting phenotypic traits linked to human resilience to Alzheimer's pathology. *Brain* **136**, 2510–2526, <https://doi.org/10.1093/brain/awt171>
- 34 Carter, S.F., Scholl, M., Almkvist, O., Wall, A., Engler, H., Langstrom, B. et al. (2012) Evidence for astrocytosis in prodromal Alzheimer disease provided by 11C-deuterium-L-deprenyl: a multitracer PET paradigm combining 11C-Pittsburgh compound B and 18F-FDG. *J. Nucl. Med.* **53**, 37–46, <https://doi.org/10.2967/jnumed.110.087031>
- 35 Benedet, A.L., Mila-Aloma, M., Vrillon, A., Ashton, N.J., Pascoal, T.A., Lussier, F. et al. (2021) Differences between plasma and cerebrospinal fluid glial fibrillary acidic protein levels across the Alzheimer Disease continuum. *JAMA Neurol.* **78**, 1471–1483, <https://doi.org/10.1001/jamaneurol.2021.3671>
- 36 Ferrari-Souza, J.P., Ferreira, P.C.L., Bellaver, B., Tissot, C., Wang, Y.T., Leffa, D.T. et al. (2022) Astrocyte biomarker signatures of amyloid-beta and tau pathologies in Alzheimer's disease. *Mol. Psychiatry*, <https://doi.org/10.1038/s41380-022-01716-2>
- 37 Carter, S.F., Herholz, K., Rosa-Neto, P., Pellerin, L., Nordberg, A. and Zimmer, E.R. (2019) Astrocyte biomarkers in Alzheimer's disease. *Trends Mol. Med.* **25**, 77–95, <https://doi.org/10.1016/j.molmed.2018.11.006>
- 38 Querol-Vilaseca, M., Colom-Cadena, M., Pegueroles, J., San Martin-Paniello, C., Clarimon, J., Belbin, O. et al. (2017) YKL-40 (Chitinase 3-like I) is expressed in a subset of astrocytes in Alzheimer's disease and other tauopathies. *J. Neuroinflammation* **14**, 118, <https://doi.org/10.1186/s12974-017-0893-7>
- 39 Muszynski, P., Groblewska, M., Kulczynska-Przybik, A., Kulakowska, A. and Mroczko, B. (2017) YKL-40 as a potential biomarker and a possible target in therapeutic strategies of Alzheimer's disease. *Curr. Neuropharmacol.* **15**, 906–917, <https://doi.org/10.2174/1570159X15666170208124324>
- 40 Gispert, J.D., Monte, G.C., Falcon, C., Tucholka, A., Rojas, S., Sanchez-Valle, R. et al. (2016) CSF YKL-40 and pTau181 are related to different cerebral morphometric patterns in early AD. *Neurobiol. Aging* **38**, 47–55, <https://doi.org/10.1016/j.neurobiolaging.2015.10.022>
- 41 Liddel, S.A., Guttenplan, K.A., Clarke, L.E., Bennett, F.C., Bohlen, C.J., Schirmer, L. et al. (2017) Neurotoxic reactive astrocytes are induced by activated microglia. *Nature* **541**, 481–487, <https://doi.org/10.1038/nature21029>
- 42 Galea, E., Weinstock, L.D., Larramona-Arcas, R., Pybus, A.F., Gimenez-Llort, L., Escartin, C. et al. (2022) Multi-transcriptomic analysis points to early organelle dysfunction in human astrocytes in Alzheimer's disease. *Neurobiol. Dis.* **166**, 105655, <https://doi.org/10.1016/j.nbd.2022.105655>
- 43 Heneka, M.T., Carson, M.J., El Khoury, J., Landreth, G.E., Brosseron, F., Feinstein, D.L. et al. (2015) Neuroinflammation in Alzheimer's disease. *Lancet Neurol.* **14**, 388–405, [https://doi.org/10.1016/S1474-4422\(15\)70016-5](https://doi.org/10.1016/S1474-4422(15)70016-5)
- 44 Bours, M.J., Swennen, E.L., Di Virgilio, F., Cronstein, B.N. and Dagnelie, P.C. (2006) Adenosine 5'-triphosphate and adenosine as endogenous signaling molecules in immunity and inflammation. *Pharmacol. Ther.* **112**, 358–404, <https://doi.org/10.1016/j.pharmthera.2005.04.013>
- 45 Chen, G.Y. and Nunez, G. (2010) Sterile inflammation: sensing and reacting to damage. *Nat. Rev. Immunol.* **10**, 826–837, <https://doi.org/10.1038/nri2873>
- 46 Wang, P. and Ye, Y. (2021) Filamentous recombinant human Tau activates primary astrocytes via an integrin receptor complex. *Nat. Commun.* **12**, 95, <https://doi.org/10.1038/s41467-020-20322-w>
- 47 Liu, C.C., Hu, J., Zhao, N., Wang, J., Wang, N., Cirrito, J.R. et al. (2017) Astrocytic LRP1 mediates brain abeta clearance and impacts amyloid deposition. *J. Neurosci.* **37**, 4023–4031, <https://doi.org/10.1523/JNEUROSCI.3442-16.2017>
- 48 Li, D. and Wu, M. (2021) Pattern recognition receptors in health and diseases. *Signal Transduct Target Ther.* **6**, 291, <https://doi.org/10.1038/s41392-021-00687-0>
- 49 Price, B.R., Johnson, L.A. and Norris, C.M. (2021) Reactive astrocytes: The nexus of pathological and clinical hallmarks of Alzheimer's disease. *Ageing Res. Rev.* **68**, 101335, <https://doi.org/10.1016/j.arr.2021.101335>
- 50 Burnstock, G. (1976) Purinergic receptors. *J. Theor. Biol.* **62**, 491–503, [https://doi.org/10.1016/0022-5193\(76\)90133-8](https://doi.org/10.1016/0022-5193(76)90133-8)
- 51 Verkhratsky, A. and Burnstock, G. (2014) Purinergic and glutamatergic receptors on astroglia. *Adv. Neurobiol.* **11**, 55–79, [https://doi.org/10.1007/978-3-319-08894-5\\_4](https://doi.org/10.1007/978-3-319-08894-5_4)
- 52 Knosp, M., Muller, C.E., Rosa, P., Abdelrahman, A., von Kugelgen, I., Thimm, D. et al. (2013) The rat adenosine receptor: pharmacological characterization and mutagenesis studies to investigate its putative ligand binding site. *Purinergic Signal.* **9**, 367–381, <https://doi.org/10.1007/s11302-013-9355-6>
- 53 Gorzalka, S., Vittori, S., Volpini, R., Cristalli, G., von Kugelgen, I. and Muller, C.E. (2005) Evidence for the functional expression and pharmacological characterization of adenosine receptors in native cells and tissues. *Mol. Pharmacol.* **67**, 955–964, <https://doi.org/10.1124/mol.104.006601>
- 54 Abbracchio, M.P. and Burnstock, G. (1994) Purinoceptors: are there families of P2X and P2Y purinoceptors? *Pharmacol. Ther.* **64**, 445–475, [https://doi.org/10.1016/0163-7258\(94\)00048-4](https://doi.org/10.1016/0163-7258(94)00048-4)
- 55 Fields, R.D. and Burnstock, G. (2006) Purinergic signalling in neuron-glia interactions. *Nat. Rev. Neurosci.* **7**, 423–436, <https://doi.org/10.1038/nrn1928>
- 56 Surprenant, A., Rassendren, F., Kawashima, E., North, R.A. and Buell, G. (1996) The cytolytic P2Z receptor for extracellular ATP identified as a P2X receptor (P2X7). *Science* **272**, 735–738, <https://doi.org/10.1126/science.272.5262.735>



- 57 Di Virgilio, F., Dal Ben, D., Sarti, A.C., Giuliani, A.L. and Falzoni, S. (2017) The P2X7 receptor in infection and inflammation. *Immunity* **47**, 15–31, <https://doi.org/10.1016/j.immuni.2017.06.020>
- 58 Harkat, M., Peverini, L., Cerdan, A.H., Dunning, K., Beudez, J., Martz, A. et al. (2017) On the permeation of large organic cations through the pore of ATP-gated P2X receptors. *Proc. Natl. Acad. Sci. U.S.A.* **114**, E3786–E3795, <https://doi.org/10.1073/pnas.1701379114>
- 59 McCarthy, A.E., Yoshioka, C. and Mansoor, S.E. (2019) Full-length P2X7 structures reveal how palmitoylation prevents channel desensitization. *Cell* **179**, 659e13–670e13, <https://doi.org/10.1016/j.cell.2019.09.017>
- 60 Zhou, M., Du, Y., Aten, S. and Terman, D. (2021) On the electrical passivity of astrocyte potassium conductance. *J. Neurophysiol.* **126**, 1403–1419, <https://doi.org/10.1152/jn.00330.2021>
- 61 Bartlett, R., Stokes, L. and Sluyter, R. (2014) The P2X7 receptor channel: recent developments and the use of P2X7 antagonists in models of disease. *Pharmacol. Rev.* **66**, 638–675, <https://doi.org/10.1124/pr.113.008003>
- 62 Gu, B.J., Sluyter, R., Skarratt, K.K., Shemon, A.N., Dao-Ung, L.P., Fuller, S.J. et al. (2004) An Arg307 to Gln polymorphism within the ATP-binding site causes loss of function of the human P2X7 receptor. *J. Biol. Chem.* **279**, 31287–31295, <https://doi.org/10.1074/jbc.M313902200>
- 63 Wiley, J.S., Dao-Ung, L.P., Li, C., Shemon, A.N., Gu, B.J., Smart, M.L. et al. (2003) An Ile-568 to Asn polymorphism prevents normal trafficking and function of the human P2X7 receptor. *J. Biol. Chem.* **278**, 17108–17113, <https://doi.org/10.1074/jbc.M212759200>
- 64 Gu, B.J., Zhang, W., Worthington, R.A., Sluyter, R., Dao-Ung, P., Petrou, S. et al. (2001) A Glu-496 to Ala polymorphism leads to loss of function of the human P2X7 receptor. *J. Biol. Chem.* **276**, 11135–11142, <https://doi.org/10.1074/jbc.M010353200>
- 65 Stokes, L., Fuller, S.J., Sluyter, R., Skarratt, K.K., Gu, B.J. and Wiley, J.S. (2010) Two haplotypes of the P2X(7) receptor containing the Ala-348 to Thr polymorphism exhibit a gain-of-function effect and enhanced interleukin-1 $\beta$  secretion. *FASEB J.* **24**, 2916–2927, <https://doi.org/10.1096/fj.09-150862>
- 66 Adinolfi, E., Cirillo, M., Woltersdorf, R., Falzoni, S., Chiozzi, P., Pellegatti, P. et al. (2010) Trophic activity of a naturally occurring truncated isoform of the P2X7 receptor. *FASEB J.* **24**, 3393–3404, <https://doi.org/10.1096/fj.09-153601>
- 67 Cheewatrakoolpong, B., Gilchrist, H., Anthes, J.C. and Greenfeder, S. (2005) Identification and characterization of splice variants of the human P2X7 ATP channel. *Biochem. Biophys. Res. Commun.* **332**, 17–27, <https://doi.org/10.1016/j.bbrc.2005.04.087>
- 68 Khakh, B.S. and North, R.A. (2012) Neuromodulation by extracellular ATP and P2X receptors in the CNS. *Neuron* **76**, 51–69, <https://doi.org/10.1016/j.neuron.2012.09.024>
- 69 Darmanis, S., Sloan, S.A., Zhang, Y., Enge, M., Caneda, C., Shuer, L.M. et al. (2015) A survey of human brain transcriptome diversity at the single cell level. *Proc. Natl. Acad. Sci. U.S.A.* **112**, 7285–7290, <https://doi.org/10.1073/pnas.1507125112>
- 70 Zhang, Y., Chen, K., Sloan, S.A., Bennett, M.L., Scholze, A.R., O’Keeffe, S. et al. (2014) An RNA-sequencing transcriptome and splicing database of glia, neurons, and vascular cells of the cerebral cortex. *J. Neurosci.* **34**, 11929–11947, <https://doi.org/10.1523/JNEUROSCI.1860-14.2014>
- 71 Martin, E., Amar, M., Dalle, C., Youssef, I., Boucher, C., Le Duigou, C. et al. (2019) New role of P2X7 receptor in an Alzheimer’s disease mouse model. *Mol. Psychiatry* **24**, 108–125, <https://doi.org/10.1038/s41380-018-0108-3>
- 72 Carvalho, K., Martin, E., Ces, A., Sarrazin, N., Lagouge-Rousseau, P., Nous, C. et al. (2021) P2X7-deficiency improves plasticity and cognitive abilities in a mouse model of Tauopathy. *Prog. Neurobiol.* **206**, 102139, <https://doi.org/10.1016/j.pneurobio.2021.102139>
- 73 Matute, C., Torre, I., Perez-Cerda, F., Perez-Samartin, A., Alberdi, E., Etxebarria, E. et al. (2007) P2X(7) receptor blockade prevents ATP excitotoxicity in oligodendrocytes and ameliorates experimental autoimmune encephalomyelitis. *J. Neurosci.* **27**, 9525–9533, <https://doi.org/10.1523/JNEUROSCI.0579-07.2007>
- 74 Pietrowski, M.J., Gabr, A.A., Kozlov, S., Blum, D., Halle, A. and Carvalho, K. (2021) Glial purinergic signaling in neurodegeneration. *Front Neurol.* **12**, 654850, <https://doi.org/10.3389/fneur.2021.654850>
- 75 Illes, P., Khan, T.M. and Rubini, P. (2017) Neuronal P2X7 receptors revisited: do they really exist? *J. Neurosci.* **37**, 7049–7062, <https://doi.org/10.1523/JNEUROSCI.3103-16.2017>
- 76 Miras-Portugal, M.T., Sebastian-Serrano, A., de Diego Garcia, L. and Diaz-Hernandez, M. (2017) Neuronal P2X7 receptor: involvement in neuronal physiology and pathology. *J. Neurosci.* **37**, 7063–7072, <https://doi.org/10.1523/JNEUROSCI.3104-16.2017>
- 77 Bianco, F., Pravettoni, E., Colombo, A., Schenk, U., Moller, T., Matteoli, M. et al. (2005) Astrocyte-derived ATP induces vesicle shedding and IL-1 $\beta$  release from microglia. *J. Immunol.* **174**, 7268–7277, <https://doi.org/10.4049/jimmunol.174.11.7268>
- 78 Fischer, W., Appelt, K., Grohmann, M., Franke, H., Norenberg, W. and Illes, P. (2009) Increase of intracellular Ca<sup>2+</sup> by P2X and P2Y receptor-subtypes in cultured cortical astroglia of the rat. *Neuroscience* **160**, 767–783, <https://doi.org/10.1016/j.neuroscience.2009.02.026>
- 79 Fumagalli, M., Brambilla, R., D’Ambrosi, N., Volonte, C., Matteoli, M., Verderio, C. et al. (2003) Nucleotide-mediated calcium signaling in rat cortical astrocytes: Role of P2X and P2Y receptors. *Glia* **43**, 218–303, <https://doi.org/10.1002/glia.10248>
- 80 Parvathenani, L.K., Tertysnikova, S., Greco, C.R., Roberts, S.B., Robertson, B. and Posmantur, R. (2003) P2X7 mediates superoxide production in primary microglia and is up-regulated in a transgenic mouse model of Alzheimer’s disease. *J. Biol. Chem.* **278**, 13309–13317, <https://doi.org/10.1074/jbc.M209478200>
- 81 Duan, S., Anderson, C.M., Keung, E.C., Chen, Y., Chen, Y. and Swanson, R.A. (2003) P2X7 receptor-mediated release of excitatory amino acids from astrocytes. *J. Neurosci.* **23**, 1320–1328, <https://doi.org/10.1523/JNEUROSCI.23-04-01320.2003>
- 82 Pannicke, T., Fischer, W., Biedermann, B., Schadlich, H., Grosche, J., Faude, F. et al. (2000) P2X7 receptors in Muller glial cells from the human retina. *J. Neurosci.* **20**, 5965–5972, <https://doi.org/10.1523/JNEUROSCI.20-16-05965.2000>
- 83 Norenberg, W., Schunk, J., Fischer, W., Sobottka, H., Riedel, T., Oliveira, J.F. et al. (2010) Electrophysiological classification of P2X7 receptors in rat cultured neocortical astroglia. *Br. J. Pharmacol.* **160**, 1941–1952, <https://doi.org/10.1111/j.1476-5381.2010.00736.x>
- 84 Oliveira, J.F., Riedel, T., Leichsenring, A., Heine, C., Franke, H., Krugel, U. et al. (2011) Rodent cortical astroglia express *in situ* functional P2X7 receptors sensing pathologically high ATP concentrations. *Cereb. Cortex* **21**, 806–820, <https://doi.org/10.1093/cercor/bhq154>

- 85 Illes, P., Verkhatsky, A., Burnstock, G. and Franke, H. (2012) P2X receptors and their roles in astroglia in the central and peripheral nervous system. *Neuroscientist* **18**, 422–438, <https://doi.org/10.1177/1073858411418524>
- 86 Kesavan, J., Watters, O., Dinkel, K., Hamacher, M., Prehn, J.H.M., Henshall, D.C. et al. (2021) Functional expression of the ATP-gated P2X7 receptor in human iPSC-derived neurons and astrocytes. *BioRxiv*, <https://doi.org/10.1101/2021.03.28.437391>
- 87 Murakami, K., Nakamura, Y. and Yoneda, Y. (2003) Potentiation by ATP of lipopolysaccharide-stimulated nitric oxide production in cultured astrocytes. *Neuroscience* **117**, 37–42, [https://doi.org/10.1016/S0306-4522\(02\)00804-7](https://doi.org/10.1016/S0306-4522(02)00804-7)
- 88 Munoz, F.M., Patel, P.A., Gao, X., Mei, Y., Xia, J., Gilels, S. et al. (2020) Reactive oxygen species play a role in P2X7 receptor-mediated IL-6 production in spinal astrocytes. *Purinergic Signal*. **16**, 97–107, <https://doi.org/10.1007/s11302-020-09691-5>
- 89 Panenka, W., Jijon, H., Herx, L.M., Armstrong, J.N., Feighan, D., Wei, T. et al. (2001) P2X7-like receptor activation in astrocytes increases chemokine monocyte chemoattractant protein-1 expression via mitogen-activated protein kinase. *J. Neurosci.* **21**, 7135–7142, <https://doi.org/10.1523/JNEUROSCI.21-18-07135.2001>
- 90 Bianco, F., Colombo, A., Saglietti, L., Lecca, D., Abbracchio, M.P., Matteoli, M. et al. (2009) Different properties of P2X(7) receptor in hippocampal and cortical astrocytes. *Purinergic Signal*. **5**, 233–240, <https://doi.org/10.1007/s11302-009-9137-3>
- 91 Jacques-Silva, M.C., Rodnight, R., Lenz, G., Liao, Z., Kong, Q., Tran, M. et al. (2004) P2X7 receptors stimulate AKT phosphorylation in astrocytes. *Br. J. Pharmacol.* **141**, 1106–1117, <https://doi.org/10.1038/sj.bjp.0705685>
- 92 Walter, L., Dinh, T. and Stella, N. (2004) ATP induces a rapid and pronounced increase in 2-arachidonoylglycerol production by astrocytes, a response limited by monoacylglycerol lipase. *J. Neurosci.* **24**, 8068–8074, <https://doi.org/10.1523/JNEUROSCI.2419-04.2004>
- 93 Ballerini, P., Ciccarelli, R., Caciagli, F., Rathbone, M.P., Werstliuk, E.S., Traversa, U. et al. (2005) P2X7 receptor activation in rat brain cultured astrocytes increases the biosynthetic release of cysteinyl leukotrienes. *Int. J. Immunopathol. Pharmacol.* **18**, 417–430, <https://doi.org/10.1177/039463200501800303>
- 94 Wei, W., Ryu, J.K., Choi, H.B. and McLarnon, J.G. (2008) Expression and function of the P2X(7) receptor in rat C6 glioma cells. *Cancer Lett.* **260**, 79–87, <https://doi.org/10.1016/j.canlet.2007.10.025>
- 95 Pan, H.C., Chou, Y.C. and Sun, S.H. (2015) P2X7 R-mediated Ca(2+) -independent d-serine release via pannexin-1 of the P2X7 R-pannexin-1 complex in astrocytes. *Glia* **63**, 877–893, <https://doi.org/10.1002/glia.22790>
- 96 Suadican, S.O., Brosnan, C.F. and Scemes, E. (2006) P2X7 receptors mediate ATP release and amplification of astrocytic intercellular Ca2+ signaling. *J. Neurosci.* **26**, 1378–1385, <https://doi.org/10.1523/JNEUROSCI.3902-05.2006>
- 97 Sanz, J.M., Falzoni, S., Rizzo, R., Cipollone, F., Zuliani, G. and Di Virgilio, F. (2014) Possible protective role of the 489C>T P2X7R polymorphism in Alzheimer's disease. *Exp. Gerontol.* **60**, 117–119, <https://doi.org/10.1016/j.exger.2014.10.009>
- 98 McLarnon, J.G., Ryu, J.K., Walker, D.G. and Choi, H.B. (2006) Upregulated expression of purinergic P2X(7) receptor in Alzheimer disease and amyloid-beta peptide-treated microglia and in peptide-injected rat hippocampus. *J. Neuropathol. Exp. Neurol.* **65**, 1090–1097, <https://doi.org/10.1097/01.jnen.0000240470.97295.d3>
- 99 Martinez-Frailes, C., Di Lauro, C., Bianchi, C., de Diego-Garcia, L., Sebastian-Serrano, A., Bosca, L. et al. (2019) Amyloid peptide induced neuroinflammation increases the P2X7 receptor expression in microglial cells, impacting on its functionality. *Front. Cell Neurosci.* **13**, 143, <https://doi.org/10.3389/fncel.2019.00143>
- 100 Lee, H.G., Won, S.M., Gwag, B.J. and Lee, Y.B. (2011) Microglial P2X(7) receptor expression is accompanied by neuronal damage in the cerebral cortex of the APPswe/PS1dE9 mouse model of Alzheimer's disease. *Exp. Mol. Med.* **43**, 7–14, <https://doi.org/10.3858/emm.2011.43.1.001>
- 101 Di Lauro, C., Bianchi, C., Sebastian-Serrano, A., Soria-Tobar, L., Alvarez-Castelao, B., Nicke, A. et al. (2022) P2X7 receptor blockade reduces tau induced toxicity, therapeutic implications in tauopathies. *Prog. Neurobiol.* **208**, 102173, <https://doi.org/10.1016/j.pneurobio.2021.102173>
- 102 Chow, S.K., Yu, D., Macdonald, C.L., Buibas, M. and Silva, G.A. (2010) Amyloid beta-peptide directly induces spontaneous calcium transients, delayed intercellular calcium waves and gliosis in rat cortical astrocytes. *ASN Neuro* **2**, e00026, <https://doi.org/10.1042/AN20090035>
- 103 Haughey, N.J. and Mattson, M.P. (2003) Alzheimer's amyloid beta-peptide enhances ATP/gap junction-mediated calcium-wave propagation in astrocytes. *Neuromolecular Med.* **3**, 173–180, <https://doi.org/10.1385/NMM:3:3:173>
- 104 Paumier, A., Boisseau, S., Jacquier-Sarlin, M., Pernet-Gallay, K., Buisson, A. and Albricieux, M. (2022) Astrocyte-neuron interplay is critical for Alzheimer's disease pathogenesis and is rescued by TRPA1 channel blockade. *Brain* **145**, 388–405, <https://doi.org/10.1093/brain/awab281>
- 105 Wolosker, H., Balu, D.T. and Coyle, J.T. (2016) The Rise and fall of the d-serine-mediated gliotransmission hypothesis. *Trends Neurosci.* **39**, 712–721, <https://doi.org/10.1016/j.tins.2016.09.007>
- 106 Mosconi, L. (2005) Brain glucose metabolism in the early and specific diagnosis of Alzheimer's disease. FDG-PET studies in MCI and AD. *Eur. J. Nucl. Med. Mol. Imaging* **32**, 486–510, <https://doi.org/10.1007/s00259-005-1762-7>
- 107 An, Y., Varma, V.R., Varma, S., Casanova, R., Dammer, E., Pletnikova, O. et al. (2018) Evidence for brain glucose dysregulation in Alzheimer's disease. *Alzheimers Dement* **14**, 318–329, <https://doi.org/10.1016/j.jalz.2017.09.011>
- 108 Bonvento, G., Olliet, S.H.R. and Panatier, A. (2022) Glycolysis-derived L-serine levels versus PHGDH expression in Alzheimer's disease. *Cell Metab.* **34**, 654–655, <https://doi.org/10.1016/j.cmet.2022.04.002>
- 109 Le Douce, J., Maugard, M., Veran, J., Matos, M., Jegou, P., Vigneron, P.A. et al. (2020) Impairment of Glycolysis-Derived L-Serine Production in Astrocytes Contributes to Cognitive Deficits in Alzheimer's Disease. *Cell Metab.* **31**, 503e8–517e8, <https://doi.org/10.1016/j.cmet.2020.02.004>
- 110 Hefendehl, J.K., LeDue, J., Ko, R.W., Mahler, J., Murphy, T.H. and MacVicar, B.A. (2016) Mapping synaptic glutamate transporter dysfunction in vivo to regions surrounding Abeta plaques by iGluSnFR two-photon imaging. *Nat Commun.* **7**, 13441, <https://doi.org/10.1038/ncomms13441>
- 111 Li, S., Jin, M., Koeglspenger, T., Shepardson, N.E., Shankar, G.M. and Selkoe, D.J. (2011) Soluble Abeta oligomers inhibit long-term potentiation through a mechanism involving excessive activation of extrasynaptic NR2B-containing NMDA receptors. *J. Neurosci.* **31**, 6627–6638, <https://doi.org/10.1523/JNEUROSCI.0203-11.2011>

- 112 Kobayashi, E., Nakano, M., Kubota, K., Himuro, N., Mizoguchi, S., Chikenji, T. et al. (2018) Activated forms of astrocytes with higher GLT-1 expression are associated with cognitive normal subjects with Alzheimer pathology in human brain. *Sci. Rep.* **8**, 1712, <https://doi.org/10.1038/s41598-018-19442-7>
- 113 Sanz, J.M., Chiozzi, P., Ferrari, D., Colaianna, M., Idzko, M., Falzoni, S. et al. (2009) Activation of microglia by amyloid {beta} requires P2X7 receptor expression. *J. Immunol.* **182**, 4378–4385, <https://doi.org/10.4049/jimmunol.0803612>
- 114 Fellin, T., Pozzan, T. and Carmignoto, G. (2006) Purinergic receptors mediate two distinct glutamate release pathways in hippocampal astrocytes. *J. Biol. Chem.* **281**, 4274–4284, <https://doi.org/10.1074/jbc.M510679200>
- 115 Ficker, C., Rozmer, K., Kato, E., Ando, R.D., Schumann, L., Krugel, U. et al. (2014) Astrocyte-neuron interaction in the substantia gelatinosa of the spinal cord dorsal horn via P2X7 receptor-mediated release of glutamate and reactive oxygen species. *Glia* **62**, 1671–1686, <https://doi.org/10.1002/glia.22707>
- 116 Wu, Z., Guo, Z., Gearing, M. and Chen, G. (2014) Tonic inhibition in dentate gyrus impairs long-term potentiation and memory in an Alzheimer's [corrected] disease model. *Nat. Commun.* **5**, 4159, <https://doi.org/10.1038/ncomms5159>
- 117 Khan, M.T., Deussing, J., Tang, Y. and Illes, P. (2019) Astrocytic rather than neuronal P2X7 receptors modulate the function of the tri-synaptic network in the rodent hippocampus. *Brain Res. Bull.* **151**, 164–173, <https://doi.org/10.1016/j.brainresbull.2018.07.016>
- 118 Sung, K. and Jimenez-Sanchez, M. (2020) Autophagy in Astrocytes and its Implications in Neurodegeneration. *J. Mol. Biol.* **432**, 2605–2621, <https://doi.org/10.1016/j.jmb.2019.12.041>
- 119 Mathur, R., Ince, P.G., Minett, T., Garwood, C.J., Shaw, P.J., Matthews, F.E. et al. (2015) A reduced astrocyte response to beta-amyloid plaques in the ageing brain associates with cognitive impairment. *PLoS ONE* **10**, e0118463, <https://doi.org/10.1371/journal.pone.0118463>
- 120 Lasagna-Reeves, C.A. and Kaye, R. (2011) Astrocytes contain amyloid-beta annular protofibrils in Alzheimer's disease brains. *FEBS Lett.* **585**, 3052–3057, <https://doi.org/10.1016/j.febslet.2011.08.027>
- 121 Davis, N., Mota, B.C., Stead, L., Palmer, E.O.C., Lombardero, L., Rodriguez-Puertas, R. et al. (2021) Pharmacological ablation of astrocytes reduces Abeta degradation and synaptic connectivity in an *ex vivo* model of Alzheimer's disease. *J. Neuroinflammation* **18**, 73, <https://doi.org/10.1186/s12974-021-02117-y>
- 122 Pihlaja, R., Koistinaho, J., Malm, T., Sikkilä, H., Vainio, S. and Koistinaho, M. (2008) Transplanted astrocytes internalize deposited beta-amyloid peptides in a transgenic mouse model of Alzheimer's disease. *Glia* **56**, 154–163, <https://doi.org/10.1002/glia.20599>
- 123 Kraft, A.W., Hu, X., Yoon, H., Yan, P., Xiao, Q., Wang, Y. et al. (2013) Attenuating astrocyte activation accelerates plaque pathogenesis in APP/PS1 mice. *FASEB J.* **27**, 187–198, <https://doi.org/10.1096/fj.12-208660>
- 124 Furman, J.L., Sama, D.M., Gant, J.C., Beckett, T.L., Murphy, M.P., Bachstetter, A.D. et al. (2012) Targeting astrocytes ameliorates neurologic changes in a mouse model of Alzheimer's disease. *J. Neurosci.* **32**, 16129–16140, <https://doi.org/10.1523/JNEUROSCI.2323-12.2012>
- 125 Koistinaho, M., Lin, S., Wu, X., Esterman, M., Koger, D., Hanson, J. et al. (2004) Apolipoprotein E promotes astrocyte colocalization and degradation of deposited amyloid-beta peptides. *Nat. Med.* **10**, 719–726, <https://doi.org/10.1038/nm1058>
- 126 Xiao, Q., Yan, P., Ma, X., Liu, H., Perez, R., Zhu, A. et al. (2014) Enhancing astrocytic lysosome biogenesis facilitates Abeta clearance and attenuates amyloid plaque pathogenesis. *J. Neurosci.* **34**, 9607–9620, <https://doi.org/10.1523/JNEUROSCI.3788-13.2014>
- 127 Leal, M.C., Dorfman, V.B., Gamba, A.F., Frangione, B., Wisniewski, T., Castano, E.M. et al. (2006) Plaque-associated overexpression of insulin-degrading enzyme in the cerebral cortex of aged transgenic tg2576 mice with Alzheimer pathology. *J. Neuropathol. Exp. Neurol.* **65**, 976–987, <https://doi.org/10.1097/01.jnen.0000235853.70092.ba>
- 128 Palmer, J.C., Baig, S., Kehoe, P.G. and Love, S. (2009) Endothelin-converting enzyme-2 is increased in Alzheimer's disease and up-regulated by Abeta. *Am. J. Pathol.* **175**, 262–270, <https://doi.org/10.2353/ajpath.2009.081054>
- 129 de Calignon, A., Polydoro, M., Suarez-Calvet, M., William, C., Adamowicz, D.H., Kopeikina, K.J. et al. (2012) Propagation of tau pathology in a model of early Alzheimer's disease. *Neuron* **73**, 685–697, <https://doi.org/10.1016/j.neuron.2011.11.033>
- 130 Martini-Stoica, H., Cole, A.L., Swartzlander, D.B., Chen, F., Wan, Y.W., Bajaj, L. et al. (2018) TFEB enhances astroglial uptake of extracellular tau species and reduces tau spreading. *J. Exp. Med.* **215**, 2355–2377, <https://doi.org/10.1084/jem.20172158>
- 131 Perea, J.R., Lopez, E., Diez-Ballesteros, J.C., Avila, J., Hernandez, F. and Bolos, M. (2019) Extracellular monomeric tau is internalized by astrocytes. *Front. Neurosci.* **13**, 442, <https://doi.org/10.3389/fnins.2019.00442>
- 132 Puangmalai, N., Bhatt, N., Montalbano, M., Sengupta, U., Gaikwad, S., Ventura, F. et al. (2020) Internalization mechanisms of brain-derived tau oligomers from patients with Alzheimer's disease, progressive supranuclear palsy and dementia with Lewy bodies. *Cell Death Dis.* **11**, 314, <https://doi.org/10.1038/s41419-020-2503-3>
- 133 Rauch, J.N., Luna, G., Guzman, E., Audouard, M., Challis, C., Sibih, Y.E. et al. (2020) LRP1 is a master regulator of tau uptake and spread. *Nature* **580**, 381–385, <https://doi.org/10.1038/s41586-020-2156-5>
- 134 Reid, M.J., Beltran-Lobo, P., Johnson, L., Perez-Nievas, B.G. and Noble, W. (2020) Astrocytes in tauopathies. *Front. Neurol.* **11**, 572850, <https://doi.org/10.3389/fneur.2020.572850>
- 135 Diaz-Hernandez, J.I., Gomez-Villafuertes, R., Leon-Otegui, M., Hontecillas-Prieto, L., Del Puerto, A., Trejo, J.L. et al. (2012) In vivo P2X7 inhibition reduces amyloid plaques in Alzheimer's disease through GSK3beta and secretases. *Neurobiol. Aging* **33**, 1816–1828, <https://doi.org/10.1016/j.neurobiolaging.2011.09.040>
- 136 Ruan, Z., Delpech, J.C., Venkatesan Kalavai, S., Van Enoo, A.A., Hu, J., Ikezu, S. et al. (2020) P2RX7 inhibitor suppresses exosome secretion and disease phenotype in P301S tau transgenic mice. *Mol. Neurodegener.* **15**, 47, <https://doi.org/10.1186/s13024-020-00396-2>
- 137 Takenouchi, T., Fujita, M., Sugama, S., Kitani, H. and Hashimoto, M. (2009) The role of the P2X7 receptor signaling pathway for the release of autolysosomes in microglial cells. *Autophagy* **5**, 723–724, <https://doi.org/10.4161/auto.5.5.8478>
- 138 Takenouchi, T., Nakai, M., Iwamaru, Y., Sugama, S., Tsukimoto, M., Fujita, M. et al. (2009) The activation of P2X7 receptor impairs lysosomal functions and stimulates the release of autophagolysosomes in microglial cells. *J. Immunol.* **182**, 2051–2062, <https://doi.org/10.4049/jimmunol.0802577>

- 139 Kim, J.E., Ko, A.R., Hyun, H.W., Min, S.J. and Kang, T.C. (2018) P2RX7-MAPK1/2-SP1 axis inhibits MTOR independent HSPB1-mediated astroglial autophagy. *Cell Death Dis.* **9**, 546, <https://doi.org/10.1038/s41419-018-0586-x>
- 140 Lee, D.S. and Kim, J.E. (2020) P2 x 7 receptor inhibits astroglial autophagy via regulating FAK- and PHLPP1/2-Mediated AKT-S473 phosphorylation following kainic acid-induced seizures. *Int. J. Mol. Sci.* **21**, 6476, <https://doi.org/10.3390/ijms21186476>
- 141 Ryu, H.J., Kim, J.E., Yeo, S.I. and Kang, T.C. (2011) p65/RelA-Ser529 NF-kappaB subunit phosphorylation induces autophagic astroglial death (Clasmatodendrosis) following status epilepticus. *Cell. Mol. Neurobiol.* **31**, 1071–1078, <https://doi.org/10.1007/s10571-011-9706-1>
- 142 Kim, J.E., Ryu, H.J., Yeo, S.I. and Kang, T.C. (2011) P2X7 receptor differentially modulates astroglial apoptosis and clasmatodendrosis in the rat brain following status epilepticus. *Hippocampus* **21**, 1318–1333, <https://doi.org/10.1002/hipo.20850>
- 143 Holmes, B.B., DeVos, S.L., Kfoury, N., Li, M., Jacks, R., Yanamandra, K. et al. (2013) Heparan sulfate proteoglycans mediate internalization and propagation of specific proteopathic seeds. *Proc. Natl. Acad. Sci. U.S.A.* **110**, E3138–E3147, <https://doi.org/10.1073/pnas.1301440110>
- 144 Merezhko, M., Brunello, C.A., Yan, X., Vihinen, H., Jokitalo, E., Uronen, R.L. et al. (2018) Secretion of tau via an unconventional non-vesicular mechanism. *Cell Rep.* **25**, 2027e4–2035e4, <https://doi.org/10.1016/j.celrep.2018.10.078>
- 145 Mankus, C., Chi, C., Rich, C., Ren, R. and Trinkaus-Randall, V. (2012) The P2X(7) receptor regulates proteoglycan expression in the corneal stroma. *Mol. Vis.* **18**, 128–138
